# Supplementary material for: Inhibition of hepatocellular carcinoma growth via modulation of the miR-221/SOX11 axis by curcumin and berberine
Source: PeerJ journal article supplement (doi:10.7717/peerj.16593), 2023-12-07
Supplement: MIQE_Checklist.pdf [file MIQE_Checklist.pdf]

## MIQE Checklist

| ITEM TO CHECK                                                     | IMPORTANCE | CHECKLIST                                           |
|-------------------------------------------------------------------|------------|-----------------------------------------------------|
| <b>EXPRIMNETAL DESIGN</b>                                         |            |                                                     |
| Definition of experiment and control group                        | E          | Cell culture and transfection section/line100-112   |
| Number within each group                                          | E          | Cell culture and transfection section, line108      |
| Assay carried out by core lab or investigator's lab?              | D          | Cell culture and transfection section, line108      |
| Acknowledgement of author's contributions                         | D          | None                                                |
| Description                                                       | E          |                                                     |
| Volume /mass of sammples processed                                | D          | Cell culture and transfection section, line 107-108 |
| Microdissection or macrodissection                                | E          | None                                                |
| Processing procedure                                              | E          |                                                     |
| If frozen-how and how quickly?                                    | E          | None                                                |
| If fixed-with what how quickly?                                   | E          | None                                                |
| Sample storage conditions and durarion especially for ffpe sample | E          | None                                                |
| <b>NUCLEIC ACID EXTRACTION</b>                                    |            |                                                     |
| Procedure and/or details of any modifications                     | E          |                                                     |
| Name of kit and details of any modifications                      | E          | RT-qPCR assay section/line 120-132                  |
| Source of additional reagents used                                | D          | RT-qPCR assay section/line 120-132                  |
| Details of DNase or RNase treatment                               | E          | RT-qPCR assay section/line 120-132                  |
| Contamination assessment (DNA or RNA)                             | E          | RT-qPCR assay section/line 120-132                  |
| Nucleic acid quantification                                       | E          |                                                     |
| Instrument and method                                             | E          | RT-qPCR assay section/line 120-132                  |
| Purity(A260/A280)                                                 | D          | RT-qPCR assay section/line 120-132                  |
| Yield                                                             | D          | RT-qPCR assay section/line 120-132                  |
| RNA integrity method/instrument                                   | E          |                                                     |
| RIN/RQI or Cq of 3' and 5'transcripts                             | E          | RT-qPCR assay section/line 120-132                  |
| Electrophoresis traces                                            | D          | RT-qPCR assay section/line 120-132                  |
| Inhibition testing (Cq dilutions, spike or other)                 | E          | RT-qPCR assay section/line 120-132                  |
| <b>REVERSE TRANSCRIPTION</b>                                      |            |                                                     |
| Complete reaction conditions                                      | E          | RT-qPCR assay section/line 120-132                  |
| Amount of RNA and reaction volume                                 | E          | RT-qPCR assay section/line 120-132                  |
| Priming oligonucleotide and concentration                         | E          | RT-qPCR assay section/line 120-132                  |
| Reverse transcriptase and concentrarion                           | E          | RT-qPCR assay section/line 120-132                  |
| Temperature and time                                              | E          | RT-qPCR assay section/line 120-132                  |
| Manufacture of reagents and catalpgue numbers                     | D          | RT-qPCR assay section/line 120-132                  |
| Cqs with and without RT                                           | D          | RT-qPCR assay section/line 120-132                  |
| Storage conditions od cDNA                                        | D          | RT-qPCR assay section/line 120-132                  |
| <b>qPCR TARGET INFORMATION</b>                                    |            |                                                     |
| If multiplex efficiency and LOD of each assay                     | E          | Yes                                                 |
| Sequence accession number                                         | E          | Gene ID: 6664                                       |
| Location of amplicion                                             | D          | RT-qPCR assay section/line 120-132                  |

|                                                          |   |                                                     |
|----------------------------------------------------------|---|-----------------------------------------------------|
| Amplicon length                                          | E | RT-qPCR assay section/line 120-132                  |
| <i>In silico</i> specificity screen                      | E | RT-qPCR assay section/line 120-132                  |
| Pseudogenes,retrospendogenes or other homologs           | D |                                                     |
| Sequence alignmen                                        | D |                                                     |
| Secondart structure analysis of amplicon                 | D |                                                     |
| Location of each primer by exon or intron                | E | RT-qPCR assay section/line 120-132                  |
| What splice variants are targeted                        | E | RT-qPCR assay section/line 120-132                  |
| <b>qPCR OLIGONUCLEOTIDES</b>                             |   |                                                     |
| Primer sequences                                         | E | RT-qPCR assay section/line 120-132                  |
| Rtprimer DB Identification number                        | D | None                                                |
| Probe sequence                                           | D | None                                                |
| Location and identity of any modifications               | E | None                                                |
| Manufacture of oligonuclortides                          | D | None                                                |
| Purification method                                      | D | None                                                |
| <b>qPCR PROTOCOL</b>                                     |   |                                                     |
| Complete reaction conditions                             | E | RT-qPCR assay section/line 120-132                  |
| Reaction volume and amount of cDNA/DNA                   | E | RT-qPCR assay section/line 120-132                  |
| Primer,(probe),mg++,and dNTP concentrations              | E | RT-qPCR assay section/line 120-132                  |
| Polymerase identity and concentration                    | E | RT-qPCR assay section/line 120-132                  |
| Buffer/kit identity and manufacturer                     | E | RT-qPCR assay section/line 120-132                  |
| Exact chemical constitution of the buffer                | D |                                                     |
| Additives (SYBRGREENI,DMSO)                              | E | None                                                |
| Manufacture of plates/tubes and catalog number           | D | RT-qPCR assay section/line 120-132                  |
| Complete thermocycling parameters                        | E | RT-qPCR assay section/line 120-132                  |
| Reaction setup (manual/robotic)                          | D | RT-qPCR assay section/line 120-132                  |
| Manufacture of qpcr instrument                           | E | RT-qPCR assay section/line 120-132                  |
| <b>qPCR VALIDATION</b>                                   |   |                                                     |
| Evidence of optimasation(from gradients)                 | D | RT-qPCR assay section/line 120-132                  |
| Specificity(gel,sequence,melt,or digest)                 | E | RT-qPCR assay section/line 120-132                  |
| For SYBR green GREEN I,cq of the NTC                     | E | None                                                |
| Standard curves with slope and y-intercept               | E | RT-qPCR assay section/line 120-132                  |
| PCR efficiency calculated from slope                     | E | RT-qPCR assay section/line 120-132                  |
| Confidence interval for pcr efficiency or standard error | D | None                                                |
| r2 of standard curve                                     | E | RT-qPCR assay section/line 120-132                  |
| Linear dynamic range                                     | E | None                                                |
| Cq variation at lower limit                              | E | None                                                |
| Confidence intervals throughout range                    | D | None                                                |
| Evidence for limit of detection                          | E | None                                                |
| If multiplex efficiency and LOD of each assay            | E | None                                                |
| <b>DATA ANALYSIS</b>                                     |   |                                                     |
| qPCR analysis program (source,version)                   | E | RT-qPCR assay section/line 120-132                  |
| Cq method determination                                  | E | Quantitative reverse transcription-polymerase chain |
| Outlier identification and disposition                   | E | None                                                |

|                                                       |   |                                                     |
|-------------------------------------------------------|---|-----------------------------------------------------|
| Result of NTCs                                        | E | None                                                |
| Justification of number and choice of reference genes | E | None                                                |
| Description of normalisation method                   | E | Quantitative reverse transcription-polymerase chain |
| Number and concordance of biological replicates       | D | None                                                |
| Number and stage (RT or qpcr)of technical replicates  | E | Quantitative reverse transcription-polymerase chain |
| Repeatability (intra assay variation,)                | E | None                                                |
| Repeatability (intra assay variation,%CV)             | D | None                                                |
| Power analysis                                        | D | None                                                |
| Statistical methods for result significance           | E | Statistical analysis section/line 165-168.          |
| Software(source,version)                              | E | Statistical analysis section/line 165-168.          |
| Cq or raw data submission using RDML                  | D | None                                                |
